# Supplementary material for: Start-up research universities, high aspirations in a complex reality: a Russian start-up university case analysis using stakeholder value analysis and system dynamics modeling
Source: Springer Nature journal article supplement (doi:10.1186/s40604-014-0016-8), 2015-02-26
Supplement: MOESM1 [file 11901850]

Raafat M Zaini, Dmitriy E Lyan, Eric Rebentisch

Startup Research Universities, high aspirations in a complex reality: a Russian Startup University case analysis using Stakeholder Value Analysis and System Dynamics Modeling.

انطلاق جامعات البحث, طموحات عالية في واقع معقد: دراسة لحالة انطلاق الجامعة الروسية عبر تحليل قيم أصحاب المصلحة واستخدام النظام الديناميكي.

### ملخص

هناك العديد من المحاولات من طرف الحكومات في مختلف أنحاء العالم لإنشاء و المحافظة على الجامعات من الطراز العالمي.

تعتبر هذه المحاولات محدودة و قد أسفرت عن نتائج متباينة يساهم هذا المقال في إثراء الدراسات الحالية المنجزة حول الجامعات ذات الطراز العالمي عبر تقديم أنموذج استراتيجيات عملية والتي تنامت أهميتها في الأدبيات المتعلقة بإنشاء الجامعات ذات الطراز العالمي (سالمي, 2009) والتي يمكن استخدامها في اختيار فرضيات و التي تكشف عن وجود استراتيجيتين وتمكن من تحليل التعقيدات الديناميكية المتعلقة بوضع مقاييس انشاء الجامعات من الطراز العالمي.

تقدم دراسة بحثية تستند إلى الأطراف المتدخلة ذات النفوذ و إلى نظام النمذجة الديناميكية في الهندسة المعمارية و اختيار خطة استراتيجية طويلة المدى لتقييم معهد سكولكوفو للعلوم و التكنولوجيا (سكول تيتيش) الذي تم انشاؤه حديثا في موسكو- روسيا. توصلنا إلى أن وجود رأس المال الصبور و الحكومة الرشيدة يعتبر شرط أساسي في فعالية قيادة الجامعة لإدارة توقعات أصحاب المصالح و الحفاظ على معايير الجودة العالمية لطلابها و حماية تصنيفها ضمن الجامعات ذات الطراز العالمي. نعتقد أن الإطار التنفيذي و النتائج المستمدة من دراسة حالة سكول تيتيش يمكن تعميمها و الإستناد عليها في بحوث أخرى.
